# Supplementary material for: Identifying Cell Types from Spatially Referenced Single-Cell Expression Datasets
Source: PubMed Central journal article supplement (PMC4177667; doi:10.1371/journal.pcbi.1003824), 2014-09-25
Supplement: pcbi.1003824.s001.pdf [file pcbi.1003824.s001.pdf]

# Appendix

## Mean field approximations

Below we provide more information about the mean field approximation used to estimate both the conditional probabilities of a site (cell) belonging to a particular cluster given the parameter values as well as the intractable normalizing constant.

First, at iteration ( $l$ ), we define the model's full expectation as:

$$Q(\boldsymbol{\psi} | \boldsymbol{\psi}^{(l)}) = \underbrace{\sum_{\mathbf{z}} p(\mathbf{z} | \mathbf{y}; \boldsymbol{\psi}^{(l)}) \log p(\mathbf{y} | \mathbf{z}; \Theta)}_{R_y(\Theta | \boldsymbol{\psi}^{(l)})} + \underbrace{\sum_{\mathbf{z}} p(\mathbf{z} | \mathbf{y}; \boldsymbol{\psi}^{(l)}) \log p(\mathbf{z} | \boldsymbol{\beta})}_{R_z(\boldsymbol{\beta} | \boldsymbol{\psi}^{(l)})}$$

Subsequently, if  $z_i$  denotes the cluster that site  $i$  is allocated to, we can re-write  $R_y$  as:

$$R_y(\Theta | \boldsymbol{\psi}^{(l)}) = \sum_{i \in S} \sum_{z_i=1}^K [\log f_{z_i}(\mathbf{y}_i; \Theta)] p(Z_i = z_i | \mathbf{y}; \boldsymbol{\psi}^{(l)})$$

Here,  $f_{z_i}(z_i \in K, i \in S)$  denotes the emission density associated with cluster  $z_i$ , such that:

$$\begin{aligned} f_{z_i}(\mathbf{y}_i | z_i; \Theta) &= f_{z_i}(\mathbf{y}_i | z_i; \boldsymbol{\theta}_{z_i}) \\ &= \prod_{m \in M} \theta_{m, z_i}^{y_{m, i}} \times (1 - \theta_{m, z_i}^{1 - y_{m, i}}) \end{aligned}$$

Given this, we can define the intractable probability,  $t_{i h}^{(l+1)}$ , that a site,  $i$  belongs to cluster  $h$  at iteration ( $l + 1$ ) as:

$$t_{i h}^{(l+1)} = p(Z_i = h | \mathbf{y}; \boldsymbol{\psi}^{(l)})$$

The mean field approximation allows us to write the following fixed point equation:

$$t_{i h}^{l+1} \approx \frac{f_h(\mathbf{y}_i; \boldsymbol{\theta}_h^{(l)}) \exp\{\beta_h^{(l)} \sum_{j \in N(i)} t_{j h}^{(l+1)}\}}{\sum_{u=1}^K f_u(\mathbf{y}_i; \boldsymbol{\theta}_u^{(l)}) \exp\{\beta_u^{(l)} \sum_{j \in N(i)} t_{j u}^{(l+1)}\}}$$

Similarly, it can be noted that  $R_y$  contains an intractable normalizing constant,  $W(\boldsymbol{\beta})$ , which can be factorized using the mean field approximation as:

$$W(\boldsymbol{\beta}) = \sum_{\mathbf{z}'} \exp(-H(\mathbf{z}')) \approx \sum_{i \in S} \sum_{\mathbf{z}_i} \exp(-H(\mathbf{z}_i)) = \sum_{i \in S} \sum_{\mathbf{z}_i} \exp(\beta_{z_i} \sum_{j \in N(i)} 1[z_i = z_j])$$

## EM algorithm

Below we use pseudo-code to outline the EM Mean-field algorithm used in our HMRF implementation.

Listing 1: EM Mean-field algorithm in pseudo-code

```
/*retrieving parameters*/

/*Starting initialization*/
/*Reading initialization file*/
if(initialization provided) {
  Read initialization file
  Assign cluster values to  $z^{(0)}$ 
}
/*Random initialization*/
else {
  /*Generating  $R$  random initializations*/
  for( $R$  runs) {
    Generate random initialization
    Compute field likelihood (the  $R_z$  part of the full likelihood)
  }
  Select initialization with highest likelihood
  Assign cluster values to  $z^{(0)}$ 
}

/*
 $z^{(0)}$  is now defined
*Compute the initial parameters values
*/
For every cluster  $h$ , gene  $m$ , compute:
 $\theta_{m,h}^{(1)} = \arg \max_{\Theta} R_y(\Theta | \psi^{(0)}) = \frac{Expr_{m,h}}{Num_h}$ 
With  $Expr_{m,h}$  the number of sites expressing  $m$  in cluster  $h$ 
And  $Num_h$  the number of sites in cluster  $h$  in  $z^{(0)}$ 

Set  $\beta^{(1)}$  to the user defined value

/*Start EM procedure*/
/*Alternate E step and M step until convergence is reached*/
while(Clusters changed < user defined convergence limit) {
  /*Iteration  $l$ */
  /*E step*/
  Compute densities  $f_{z_i}(y_i | z_i; \Theta^{(l)})$  from the emission model
  Fixed point algorithm to compute  $t_{ih}^{(l)}$ 
  /*Create  $z^{(l)}$ */
  Assign each site  $i$  to its most probable cluster using
 $t_{ih}^{(l+1)} = p(Z_i = h | \mathbf{y}; \psi^{(l)})$ 

  /*M step*/
  Compute  $\Theta^{(l+1)}$  from  $z^{(l)}$ 
  Gradient ascent algorithm to compute  $\beta^{(l+1)}$  using the approximate
  form of  $W(\beta)$ 
}

/*Output clustering results*/
```
